# Supplementary material for: The Gene-Gene Interaction of INSIG-SCAP-SREBP Pathway on the Risk of Obesity in Chinese Children
Source: Hindawi journal article supplement (doi:10.1155/2014/538564), 2014-01-01
Supplement: f1 [file 538564.f1.pdf]

Supplementary table 1 Genotyping information of the 15 SNPs in INSIG-SCAP-SREBP pathway

|            | Nearest gene  | Chr. | Position <sup>a</sup> | Source <sup>b</sup> | Allele |       | Call rate | Total sample (11/12/22) | EAF   | HWE <i>P</i> -value | Genotype (11/12/22) |             |
|------------|---------------|------|-----------------------|---------------------|--------|-------|-----------|-------------------------|-------|---------------------|---------------------|-------------|
|            |               |      |                       |                     | Effect | Other |           |                         |       |                     | Non-obese           | Obese       |
|            |               |      |                       |                     | (1)    | (2)   |           |                         |       |                     | group               | group       |
| rs2721     | <i>INSIG1</i> | 7    | 154718676             | reference[20]       | T      | G     | 99.95%    | 189/839/1001            | 0.300 | 0.491               | 135/538/651         | 54/301/350  |
| rs13223383 | <i>INSIG1</i> | 7    | 154734715             | reference[19]       | T      | G     | 99.75%    | 185/874/966             | 0.307 | 0.527               | 126/575/622         | 59/299/344  |
| rs7566605  | <i>INSIG2</i> | 2    | 118552495             | reference[11]       | C      | G     | 100.00%   | 283/901/846             | 0.361 | 0.084               | 181/590/554         | 102/311/292 |
| rs10185316 | <i>INSIG2</i> | 2    | 118560948             | reference[18]       | G      | C     | 99.85%    | 53/497/1477             | 0.149 | 0.153               | 32/327/963          | 21/170/514  |
| rs13428113 | <i>INSIG2</i> | 2    | 118563355             | tagSNP              | C      | T     | 100.00%   | 513/977/540             | 0.493 | 0.093               | 336/641/348         | 177/336/192 |
| rs17047757 | <i>INSIG2</i> | 2    | 118577905             | tagSNP              | G      | A     | 99.90%    | 140/765/1123            | 0.258 | 0.532               | 90/492/741          | 50/273/382  |
| rs9308762  | <i>INSIG2</i> | 2    | 118580344             | reference[17,33,34] | T      | C     | 100.00%   | 567/989/474             | 0.523 | 0.288               | 370/646/309         | 197/343/165 |
| rs12487736 | <i>SCAP</i>   | 3    | 47434683              | reference[21]       | G      | A     | 99.30%    | 556/1003/457            | 0.525 | 0.909               | 347/662/309         | 209/341/148 |
| rs12490383 | <i>SCAP</i>   | 3    | 47469161              | reference [19]      | C      | T     | 99.56%    | 471/1013/537            | 0.484 | 0.873               | 289/667/364         | 182/346/173 |
| rs2297508  | <i>SREBP1</i> | 17   | 17656042              | reference [25, 27]  | C      | G     | 99.95%    | 43/531/1455             | 0.152 | 0.501               | 31/339/954          | 12/192/501  |
| rs60282872 | <i>SREBP1</i> | 17   | 17680892              | reference[22, 23]   | DEL    | C     | 99.80%    | 13/235/1778             | 0.064 | 0.09                | 12/154/1156         | 1/81/622    |
| rs7287010  | <i>SREBP2</i> | 22   | 40564883              | tagSNP              | T      | C     | 99.85%    | 280/975/772             | 0.379 | 0.317               | 183/634/506         | 97/341/266  |
| rs1883205  | <i>SREBP2</i> | 22   | 40572966              | tagSNP              | T      | C     | 99.90%    | 356/1007/665            | 0.424 | 0.452               | 232/673/418         | 124/334/247 |
| rs133290   | <i>SREBP2</i> | 22   | 40597551              | tagSNP              | C      | A     | 99.90%    | 204/886/938             | 0.319 | 0.805               | 137/580/607         | 67/306/331  |
| rs2228314  | <i>SREBP2</i> | 22   | 40606688              | reference [7, 24]   | C      | G     | 99.85%    | 101/722/1204            | 0.228 | 0.587               | 64/447/812          | 37/275/392  |

458 <sup>a</sup> Positions according to Build 36, NCBI (<http://www.ncbi.nlm.nih.gov/snp/>).

459 <sup>b</sup> The NO. of the reference is according to the reference list.

460 Abbreviations: *INSIG1*, insulin induced gene 1; *INSIG2*, insulin induced gene 2; *SCAP*, SREBP cleavage-activating protein gene; *SREBP1*, sterol regulatory element  
 461 binding protein 1 gene; *SREBP2*, sterol regulatory element binding protein 2 gene; Chr., Chromosome; EAF, effect allele frequency; HWE, Hardy Weinberg  
 462 Equilibrium.

带格式的: 宽度: 29.7 厘米, 高度: 21 厘米

带格式表格

Supplementary table 2. Results of logistic regression for the 3-locus (rs9308762/rs12487736/rs1883205) model from GMDR analyses

|                                                              | <u>N</u>    | <u>Non-obese(%)</u> | <u>Obese(%)</u>  | <u>OR</u>        | <u>95% CI</u>      | <u>P-value</u>                |
|--------------------------------------------------------------|-------------|---------------------|------------------|------------------|--------------------|-------------------------------|
| <u>Low-risk genotypes of rs9308762/rs12487736/rs1883205</u>  |             |                     |                  |                  |                    |                               |
| <u>CC/AA/CC</u>                                              | <u>43</u>   | <u>28(65.1)</u>     | <u>15(34.9)</u>  | <u>reference</u> |                    |                               |
| <u>CC/AA/CT</u>                                              | <u>66</u>   | <u>47(71.2)</u>     | <u>19(28.8)</u>  | <u>0.755</u>     | <u>0.331-1.718</u> | <u>0.502</u>                  |
| <u>CC/AA/TT</u>                                              | <u>26</u>   | <u>19(73.1)</u>     | <u>7(26.9)</u>   | <u>0.688</u>     | <u>0.236-2.004</u> | <u>0.493</u>                  |
| <u>CC/AG/CC</u>                                              | <u>64</u>   | <u>43(67.2)</u>     | <u>21(32.8)</u>  | <u>0.912</u>     | <u>0.403-2.061</u> | <u>0.824</u>                  |
| <u>CC/AG/TT</u>                                              | <u>43</u>   | <u>30(69.8)</u>     | <u>13(30.2)</u>  | <u>0.809</u>     | <u>0.328-1.997</u> | <u>0.646</u>                  |
| <u>CC/GG/CT</u>                                              | <u>65</u>   | <u>45(69.2)</u>     | <u>20(30.8)</u>  | <u>0.830</u>     | <u>0.366-1.882</u> | <u>0.655</u>                  |
| <u>CT/AA/CT</u>                                              | <u>93</u>   | <u>70(75.3)</u>     | <u>23(24.7)</u>  | <u>0.613</u>     | <u>0.280-1.344</u> | <u>0.222</u>                  |
| <u>CT/AA/TT</u>                                              | <u>33</u>   | <u>23(69.7)</u>     | <u>10(30.3)</u>  | <u>0.812</u>     | <u>0.307-2.145</u> | <u>0.674</u>                  |
| <u>CT/AG/CT</u>                                              | <u>266</u>  | <u>184(69.2)</u>    | <u>82(30.8)</u>  | <u>0.832</u>     | <u>0.422-1.640</u> | <u>0.595</u>                  |
| <u>CT/GG/CT</u>                                              | <u>146</u>  | <u>100(68.5)</u>    | <u>46(31.5)</u>  | <u>0.859</u>     | <u>0.419-1.760</u> | <u>0.677</u>                  |
| <u>CT/GG/TT</u>                                              | <u>44</u>   | <u>31(70.5)</u>     | <u>13(29.5)</u>  | <u>0.783</u>     | <u>0.318-1.928</u> | <u>0.594</u>                  |
| <u>TT/AA/CC</u>                                              | <u>33</u>   | <u>24(72.7)</u>     | <u>9(27.3)</u>   | <u>0.700</u>     | <u>0.260-1.884</u> | <u>0.480</u>                  |
| <u>TT/AA/CT</u>                                              | <u>62</u>   | <u>41(66.1)</u>     | <u>21(33.9)</u>  | <u>0.956</u>     | <u>0.422-2.168</u> | <u>0.914</u>                  |
| <u>TT/AA/TT</u>                                              | <u>20</u>   | <u>15(75.0)</u>     | <u>5(25.0)</u>   | <u>0.622</u>     | <u>0.189-2.047</u> | <u>0.435</u>                  |
| <u>TT/AG/CC</u>                                              | <u>110</u>  | <u>75(68.2)</u>     | <u>35(31.8)</u>  | <u>0.871</u>     | <u>0.414-1.834</u> | <u>0.716</u>                  |
| <u>TT/AG/CT</u>                                              | <u>119</u>  | <u>83(69.7)</u>     | <u>36(30.3)</u>  | <u>0.810</u>     | <u>0.387-1.695</u> | <u>0.575</u>                  |
| <u>TT/AG/TT</u>                                              | <u>57</u>   | <u>39(68.4)</u>     | <u>18(31.6)</u>  | <u>0.862</u>     | <u>0.372-1.995</u> | <u>0.728</u>                  |
| <u>TT/GG/CC</u>                                              | <u>65</u>   | <u>45(69.2)</u>     | <u>20(30.8)</u>  | <u>0.830</u>     | <u>0.366-1.882</u> | <u>0.655</u>                  |
| <u>High-risk genotypes of rs9308762/rs12487736/rs1883205</u> |             |                     |                  |                  |                    |                               |
| <u>CC/AG/CT</u>                                              | <u>107</u>  | <u>63(58.9)</u>     | <u>44(41.1)</u>  | <u>1.304</u>     | <u>0.625-2.721</u> | <u>0.480</u>                  |
| <u>CC/GG/CC</u>                                              | <u>38</u>   | <u>23(60.5)</u>     | <u>15(39.5)</u>  | <u>1.217</u>     | <u>0.493-3.005</u> | <u>0.670</u>                  |
| <u>CC/GG/TT</u>                                              | <u>18</u>   | <u>10(55.6)</u>     | <u>8(44.4)</u>   | <u>1.493</u>     | <u>0.487-4.583</u> | <u>0.483</u>                  |
| <u>CT/AA/CC</u>                                              | <u>81</u>   | <u>42(51.9)</u>     | <u>39(48.1)</u>  | <u>1.733</u>     | <u>0.808-3.720</u> | <u>0.158</u>                  |
| <u>CT/AG/CC</u>                                              | <u>145</u>  | <u>90(62.1)</u>     | <u>55(37.9)</u>  | <u>1.141</u>     | <u>0.560-2.323</u> | <u>0.717</u>                  |
| <u>CT/AG/TT</u>                                              | <u>92</u>   | <u>55(59.8)</u>     | <u>37(40.2)</u>  | <u>1.256</u>     | <u>0.591-2.666</u> | <u>0.553</u>                  |
| <u>CT/GG/CC</u>                                              | <u>82</u>   | <u>45(54.9)</u>     | <u>37(45.1)</u>  | <u>1.535</u>     | <u>0.715-3.292</u> | <u>0.271</u>                  |
| <u>TT/GG/CT</u>                                              | <u>74</u>   | <u>37(50.0)</u>     | <u>37(50.0)</u>  | <u>1.867</u>     | <u>0.860-4.053</u> | <u>0.115</u>                  |
| <u>TT/GG/TT</u>                                              | <u>23</u>   | <u>10(43.5)</u>     | <u>13(56.5)</u>  | <u>2.427</u>     | <u>0.861-6.837</u> | <u>0.093</u>                  |
| <u>Genotype combination</u>                                  |             |                     |                  |                  |                    |                               |
| <u>Low-risk group</u>                                        | <u>1355</u> | <u>942(69.5)</u>    | <u>413(30.5)</u> | <u>reference</u> |                    |                               |
| <u>High-risk group</u>                                       | <u>660</u>  | <u>375(56.8)</u>    | <u>285(43.2)</u> | <u>1.799</u>     | <u>1.475-2.193</u> | <u>6.61 × 10<sup>-9</sup></u> |
